# Supplementary material for: Significance of the particle physical properties and the Geldart group in the use of correlations for the prediction of minimum fluidization velocity of biomass–sand binary mixtures
Source: Springer Nature journal article supplement (doi:10.1007/s13399-020-01189-9), 2021-01-21
Supplement: MOESM1 [file 13399_2020_1189_MOESM1_ESM.docx]

# **Significance of the particle physical properties and the Geldart group in the use of correlations for the prediction of minimum fluidization velocity of biomass-sand binary mixtures**

# Louis Edwards Cáceres-Martínez a, Diana Carolina Guío-Pérez a,b,*, Sonia Lucía Rincón-Prat a

## a Universidad Nacional de Colombia - Sede Bogotá – Facultad de Ingeniería. – Departamento de Ingeniería Mecánica y Mecatrónica, Grupo de Investigación en Biomasa y Optimización Térmica de Procesos – BIOT, Carrera 30 No 45A-03 Edificio 453, Bogotá, Colombia

## b Department of Space, Earth, and Environment, Chalmers University of Technology, Hörsalsvägen 7B, 412 96 Göteborg, Sweden

* Corresponding author: +46(0)31 772 5244. Email: [dcguiop@unal.edu.co](mailto:dcguiop@unal.edu.co); [carolina.guioperez@chalmers.se](mailto:carolina.guioperez@chalmers.se)

## Supplementary material

## Correlation factors according to Eq. (5) tested in present study.

| **No.** |  |  | **Source** |
| --- | --- | --- | --- |
| 1 | 25,46 | 0,0382 | P. Bourgeis, P. Grenier, The ratio of terminal velocity to minimum fluidization velocity for spherical particles, Can. J. of Chem. Eng. 46 (1968) 325-328. |
| 2 | 25,28 | 0,0571 | S.C. Saxena, G.S. Vogel, The measurements of incipient fluidization velocities in a bed of coarse dolomite at temperature and pressure, Trans, Inst. Chem. Eng. 3 (1977), 184-195. |
| 3 | 25,25 | 0,0651 | S.P. Babu, B. Shah, and A. Talwalker, Fluidization correlations for coal gasification materials - minimum fluidization velocity and fluidized bed expansion ratio, Chem. Eng. Prog. Sym. Series No. 74, (1978), 176– 186. |
| 4 | 24 | 0,0546 | R.P. Vaid, and P. Sen Gupta, Minimum fluidization velocities in beds of mixed solids, Can. J. of Chem. Eng., 56 (1978) 292–296. |
| 5 | 25,7 | 0,0365 | J.F. Richardson, M. A. D. S. Jeromino, Velocity voidage relations for sedimentation and fuidization, Chem. Eng. Sci. 34 (1979) 1419– 1422. |
| 6 | 28,7 | 0,0494 | D.C. Chitester, R.M. Kornosky, L.S. Fan, and J.P. Danko, Characteristics of fluidization at high pressure, Chem. Eng. Sci. 39 (1984) 253–261. |
| 7 | 31,6 | 0,0425 | V. Thonglimp, N. Hiquily and C. Laguerie, Vitesse minimale de fluidisation et expansion des couches fluidisées par un gaz, Powder Technol. 38 (1984) 233-253. |
| 8 | 19,9 | 0,03196 | V. Thonglimp, N. Hiquily, C. Laguerie, Vitesse minimale de fluidization et expansion des couches de Mélanges de particules solides fluidisées par un gaz, Powder Technol. 39 (1984) 223–239. |
| 9 | 33,95 | 0,0465 | M. Nakamura, Y. Hamada, S. Toyana, A.E. Fouda, and C. E. Capes, An experimental Investigation of minimum fluidization velocity at elevated temperatures and pressures, Can. J. Chem Eng. 63 (1985) 8-13. |
| 10 | 27,2 | 0,0408 | J.R. Grace, Hetsroni (Ed.), Handbook of Multiphase Systems, Hemisphere Publication, Washington D.C., 1986. |
| 11 | 32,1 | 0,0571 | A. Lucas, J. Arnaldos, J. Casal, and L. Pulgjaner, Improved equation for the calculation of minimum fluidization velocity, Ind. Eng. Process Des. Dev. 25 (1986) 426-429. |
| 12 | 33,3 | 0,0333 | C.S. Chyang, W.C. Huang, Characteristics of large particle fluidization, Journal of the Chinese Institution of Chem. Eng. 19 (1988) 81–89. |
| 13 | 25,18 | 0,0373 | J. Adánez, and J.C. Abanades, Minimum fluidization velocities of fluidized-bed coal combustion solids, Powder Technol. 67 (2) (1991) 113–119. |
| 14 | 23,785 | 0,0413 | K. Tannous, Thèses de doctorat, INP-Toulouse, France, 1993. |
| 15 | 25,83 | 0,043 | K. Tannous, M. Hemati, and, C. Laguerie, Caractéristiques au minimum de fluidisation et expansion des couches fluidisées de particules de la catégorie D de Geldart, Powder Technol. 80 (1994) 55–72. |
| 16 | 33,7 | 0,0408 | C.Y. Wen, Y.H. Yu, A generalized method for predicting the minimum fluidization velocity, AIChE Journal 12 (1996) 610-612. |
| 17 | 48 | 0,045 | J. Reina, E. Velo, L. Puigjaner, Predicting the minimum fluidization velocity of Poly-disperse mixtures of scrap-wood particles. Powder Technol., 111 (2000) 245–251. |
| 18 | 30,3 | 0,0546 | B.U. Kozanoglu, J. Welti Chanes, D. Garcı´a Cuautle, J.P. Santos Jean, Hydrodynamics of large particle fluidization in reduced pressure operations: an experimental study, Powder Technol. 125 (2002) 55– 60. |
| 19 | 22,1 | 0,0354 | Z. Zhiping, N. Yongjie, L. Qinggang, Effect of pressure on minimum fluidization velocity, J. of Thermal Sci. 16 (3) (2007) 264–269. |
| 20 | 30,28 | 0,046 | B. Paudel, Z.-G. Feng, Prediction of minimum fluidization velocity for binary mixtures of biomass and inert particles. Powder Technol. (2013), 134–140. |
| 21 | 30,28 | 0,108 |
